# Supplementary material for: Catch composition and risk assessment of two fishing gears used in small-scale fisheries of Bandon Bay, the Gulf of Thailand
Source: PeerJ. 2022 Aug 16;10:e13878. doi: 10.7717/peerj.13878 (PMC9390328; doi:10.7717/peerj.13878)
Supplement: Supplemental Information 1 [file peerj-10-13878-s001.xlsx]

## Sheet: Sheet1
Catch composition and risk assessment of two fishing gears used in small scale fisheries of Bandon Bay, the Gulf of Thailand
Supplement 1: Number and weight of each taxa, in catch compositions, collected in this study
Family	Scientific name	Gillnet		Trap
		Number	Weight (g)	Number	Weight (g)
Actiniidae	Anthopleura sp.	7	23.4	23	67.9
Strombidae	Doxander vittatus	1	2.8
Bursidae	Bufonaria crumena	5	97
Naticidae	Natica vitellus			8	8.9
Muricidae	Lataxiena blosvillei			2	14.7
Muricidae	Murex trapa	1	10.4
Muricidae	Murex sp.1	629	3701	17	114
Muricidae	Murex sp.2	25	316.2	15	62.2
Muricidae	Indothais sp.	7	51.3	100	247.7
Nassariidae	Rapana rapiformis	1	85.1
Nassariidae	Nassaria pusilla	2	2.1	38	60.1
Nassariidae	Nassarius siquijorensis			3	218.4
Melongenidae	Hemifusus sp.	10	294	6	233.1
Melongenidae	Pugilina Schumacher	25	2367.1	3	99.3
Fasciolariidae	Pleuroploca sp.			7	77.3
Volutidae	Cymbiola nobilis	1	744.2	3	379.1
Volutidae	Melo melo	4	1602.1
Arcidae	Anadara inaequivalvis	2	112.9	10	235
Arcidae	Tegillarca nodifera	7	24.6	13	74.6
Pectinidae	Chlamys sp.			1	4.6
Pectinidae	Mimachlamys sp.	3	12.5	2	100
Sepiidae	Sepia sp.1	2	215.7	141	8096.5
Sepiidae	Sepia sp.2			68	2292
Sepiidae	Sepiella inermis			152	3516.1
Octopodidae	Octopus sp.	1	19.4	6	639.2
Limulidae	Carcinoscorpius rotundicauda	8	452.3
Limulidae	Tachypleus gigas	45	6397.6	14	2150.7
Squillidae	Harpiosquilla harpax	12	759.7	3	6013.3
Squillidae	Harpiosquilla raphidea	12	393.8	3	2754.8
Squillidae	Oratosquillina interrupta	18	337.7	8	2934.8
Squillidae	Oratosquilla nepa	26	815.8	54	795.2
Squillidae	Oratosquilla woodmasoni			11	20.1
Scyllaridae	Thenus indicus	3	259.8
Penaeidae	Metapenaeus sp.			35	39.2
Penaeidae	Penaeus semisulcatus	1	8.7	2	98.9
Penaeidae	Penaeus silasi			15	145.6
Palaemonidae	Macrobrachium rosenbergii			31	116
Diogenidae	Diogenes sp.1	26	47.9	43	92
Diogenidae	Diogenes sp.2	111	320.6	165	889.8
Diogenidae	Clibanarius infraspinatus	45	644.3	804	8192
Diogenidae	Dardanus lagopodes			54	180.4
Dorippidae	Dorippe quadridens	162	1496.2	1919	19128.1
Dorippidae	Neodorippe callida			4	16.9
Leucosiidae	Seulocia vittata	40	164.4	27	12
Matutidae	Matuta planipes	7	357.3	40	1245.6
Matutidae	Matuta victor	2	64.8	34	604.5
Epialtidae	Doclea armata	7	82.3	32	152.1
Epialtidae	Doclea canalifera	29	2481	37	2416.5
Epialtidae	Doclea rissoni			15	924.4
Epialtidae	Doclea sp.	7	162.2	117	382
Galenidae	Galene bispinosa	12	659.3	6	591.8
Galenidae	Halimede ochtodes	6	144.2
Parthenopidae	Rhinolambrus sp.	16	215.5
Portunidae	Lupocycloporus gracilimanus			5	34.9
Portunidae	Portunus haanii	1	6.4	2	8.1
Portunidae	Portunus pelagicus	1157	123138	1673	118744
Portunidae	Portunus sanguinolentus	47	4345.9	6	618
Portunidae	Scylla olivacea			10	2809.6
Portunidae	Xiphonectes hastatoides	1	6.5
Portunidae	Charybdis affinis	85	1413.8	7195	131080
Portunidae	Charybdis anisodon	35	476.7	80	1027.1
Portunidae	Charybdis feriata	3	389.9	108	13501.2
Portunidae	Charybdis natator	2	260
Portunidae	Charybdis truncata			5	15.7
Portunidae	Thalamita crenata			2	639.1
Portunidae	Thalamita spinimana	1	44.9	131	4074
Portunidae	Thalamita sima	1	44.9	17	698.4
Portunidae	Podophthalmus vigil	10	250
Menippidae	Myomenippe hardwickii	7	416	86	8456.5
Galenidae	Halimede ochtodes			22	127.4
Macrophthalmidae	Macrophthalmus sp.	447	4442.1
Varunidae	Varuna yui			1	286
Ophiotrichidae	Ophiocnemis marmorata	1	23.1
Ophiotrichidae	Ophiocnemis sp.			2	0.4
Ophiotrichidae	Luidia sp.	8	134.5	73	1079
Astropectinidea	Astropecten sp. 1	2	16.6	11	28.1
Astropectinidea	Astropecten sp. 2	44	205	567	2061.6
Holothuriidae	Acaudina sp.1	13	245.5	155	2459.6
Holothuriidae	Acaudina sp.2	3	149.4	41	389.1
Phyllophoridae	Phyllophorella kohkutiensis	10	912.7	63	853.8
Caudinidae	Holothuria spp.	2	7.3	2	1620.2
Pennatulidae	Pteroeides sp.	12	374.2	26	395.5
Temnopleuridae	Temnopleurus toreumaticus	436	1242.1	1460	7509.3
Schizasteridae	Schizaster lacunosus	3	19.5
Clypeasteridae	Arachnoides placenta			5	47.9
Dasyatidae	Himantura imbricata	23	2613.5
Dasyatidae	Maculabatis gerrardi	5	557.6
Muraenesocidae	Muraenesox cinereus	1	367.9	1	122.9
Clupeidae	Sardinella gibbosa			5	43.6
Engraulidae	Thryssa kammalensis			3	14.4
Ariidae	Hexanematichthys sagor	1	382.9	1	22.6
Batrachoididae	Batrachomoeus trispinosus			25	2302.5
Syngnathidae	Hippocampus sp.	1	3.1
Tetrarogidae	Vespicula trachinoides			29	138.2
Platycephalidae	Platycephalus indicus	8	1320.8	5	291.3
Platycephalidae	Platycephalus sp.	14	1204.3
Ambassidae	Ambassis sp.			4	33.9
Serranidae	Epinephelus coioides			1	105.3
Serranidae	Epinephelus sexfasciatus			22	652.6
Teraponidae	Terapon jarbua			152	2154.1
Teraponidae	Terapon puta	2	55.7	7	121.9
Teraponidae	Terapon theraps			53	386.6
Priacanthidae	Priacanthus tayenus	2	60.4
Apogonidae	Ostorhinchus fasciatus			4	60.1
Sillaginidae	Sillago sihama	7	316.3
Carangidae	Alepes djedaba			30	189.4
Carangidae	Carangoides praeustus			2	44
Carangidae	Carangoides sp.			1	2.5
Carangidae	Megalaspis cordyla	1	56.7
Leiognathidae	Eubleekeria splendens	2	177.2
Leiognathidae	Gazza minuta	5	22.7	1	15.3
Leiognathidae	Nuchequula gerreoides	1	16.3	28	135.7
Leiognathidae	Secutor hanedai			2	4
Lutjanidae	Lutjanus russelli	1	33.7	1	45
Gerreidae	Gerres macracanthus	2	28
Haemulidae	Pomadasys kaakan			1	12.4
Haemulidae	Pomadasys maculatus			5	57.8
Polynemidae	Eleutheronema tetradactylum	2	160.8
Sciaenidae	Johnius amblycephalus	2	69.6	7	126
Sciaenidae	Pseudosciaena soldado	11	318.1	15	359.4
Sciaenidae	Otolithes ruber	15	543.1	2	12.4
Sciaenidae	Pennahia anea	3	27.8	4	23.3
Sciaenidae	Panna microdon	1	10.8
Mullidae	Upeneus sulphureus			13	384.6
Mullidae	Upeneus sundaicus	5	179.5	49	1485.2
Drepaneidae	Drepane punctata	17	624.7
Ephippidae	Ephippus orbis	2	133.3
Scatophagidae	Scatophagus argus			1	29.3
Sphyraenidae	Sphyraena jello			1	6.7
Stromateidae	Pampus chinensis	2	52.7
Blenniidae	Petroscirtes sp.			1	9.3
Gobiidae	Acentrogobius caninus			3	31.9
Siganidae	Siganus canaliculatus			58	1298.4
Siganidae	Siganus javus	13	164.9	37	1443.7
Scombridae	Scomberomorus commerson	1	71.9
Cynoglossidae	Cynoglossus arel			3	34.5
Cynoglossidae	Cynoglossus trulla	1	41.8	3	47.1
Cynoglossidae	Cynoglossus sp. 1	2	95.2	8	190.6
Cynoglossidae	Cynoglossus sp.2	3	39.2	14	192.8
Soleidae	Brachirus orientalis	54	4079.4	50	1879.5
Soleidae	Brachirus harmandi	4	192.5	14	335.7
Soleidae	Synaptura commersonnii	2	109.5
Monacanthidae	Paramonacanthus choirocephalus			65	1005.7
Tetraodontidae	Chelonodon sp.			22	2703.7
Tetraodontidae	Lagocephalus lunaris	4	1301.2	58	1690.2
Tetraodontidae	Takifugu oblongus	6	1506.9	717	75054.8
