# Supplementary material for: Catch composition and risk assessment of two fishing gears used in small-scale fisheries of Bandon Bay, the Gulf of Thailand
Source: PeerJ. 2022 Aug 16;10:e13878. doi: 10.7717/peerj.13878 (PMC9390328; doi:10.7717/peerj.13878)
Supplement: Supplemental Information 2 — Note: (1) Detail of each attribute is provided in Table 1; (2) P-, S- and V- score are Productivity, Susceptibility and Vulnerability-scores respectively. [file peerj-10-13878-s002.xlsx]

## Sheet: Rank scores for gillnet
Catch composition and risk assessment of two fishing gears used in small scale fisheries of Bandon Bay, the Gulf of Thailand
Supplement data 2: Rank scores for the productivity- and susceptibiltiy attributes for the catches by bottom-set gillnets in Bandon Bay, Surratthani, Thailand.
Note: (1) Detail of each attribute is provided in Table 1; (2) P-, S- and V- score are Productivity, Susceptibility and Vulnerabi;ity-scores respectively
No	Species	P1	P2	P3	P4	P5	P6	P7	P-score	S1	S2	S3	S4	S5	S6	S-Score	V -score
1	Sea animone (Cerianthid)	NA	NA	NA	1	NA	1	1	NA	1	2	1	1	1	2	1.25992	#VALUE!
2	Bufonaria crumena	1	1	1	1	1	1	2	1.14286	3	2	3	3	3	2	2.62074	2.85909
3	Laevistrombus canarium	1	1	1	1	1	1	2	1.14286	3	2	3	3	3	2	2.62074	2.85909
4	Doxander vittatus								1.14	3	2	3	3	3	2	2.62074	2.85795
5	Indothais sp.	1	1	1	1	1	1	2	1.14286	3	2	3	2	3	2	2.44949	2.70298
6	Murex trapa	1	1	1	1	1	1	2	1.14	3	2	3	3	3	2	2.62074	2.85795
7	Murex sp.	1	1	1	1	1	1	2	1.14	3	2	3	3	3	2	2.62074	2.85795
8	Muricidae	1	1	1	1	1	1	2	1.14	3	2	3	3	3	2	2.62074	2.85795
9	Rapana rapiformis	1	1	1	1	1	1	2	1.14	3	2	3	3	3	2	2.62074	2.85795
10	Hemifusus sp.	1	1	1	1	1	1	2	1.14286	3	2	3	3	3	2	2.62074	2.85909
11	Pugilina Schumacher	1	1	1	1	1	1	2	1.14	3	2	3	3	3	2	2.62074	2.85795
12	Nassaria pusilla	1	1	1	1	1	1	2	1.14286	3	2	3	3	3	2	2.62074	2.85909
13	Nassarius siquijorensis	1	1	1	1	1	1	2	1.14	3	2	3	3	3	2	2.62074	2.85795
14	Cymbiola nobilis	1	1	1	1	1	1	2	1.14286	3	2	3	2	3	2	2.44949	2.70298
15	Melo melo	1	1	1	1	1	1	2	1.14	3	2	3	3	3	2	2.62074	2.85795
16	Anadara inaequivalvis	1	1	1	1	1	1	1	1	1	2	3	3	1	2	1.81712	2.07411
17	Tegillarca nodifera	1	1	1	1	1	1	1	1	1	2	3	3	1	2	1.81712	2.07411
18	Mimachlamys sp.	1	1	1	1	1	1	1	1	1	2	3	1	1	2	1.51309	1.81368
19	Sepia sp.1	1	1	2	1	1	2	3	1.57143	2	2	1	3	3	2	2.03965	2.57479
20	Octopus sp.	1	1	2	1	1	2	3	1.57143	3	2	1	1	3	3	1.94416	2.49983
21	Carcinoscorpius rotundicauda	1	2	2	1	1	2	2	1.57143	3	2	3	2	3	2	2.44949	2.91022
22	Tachypleus gigas	1	2	2	1	1	2	2	1.57	3	2	3	3	3	2	2.62074	3.05503
23	Metapenaeus sp.	1	1	1	1	1	1	2	1.14286	3	2	3	3	3	3	2.80397	3.02793
24	Penaeus semisulcatus	1	1	1	1	1	1	2	1.14	3	2	3	3	3	3	2.80397	3.02685
25	Penaeus silasi	1	1	1	1	1	1	2	1.14	3	2	3	3	3	3	2.80397	3.02685
26	Harpiosquilla harpax	1	1	1	1	1	2	2	1.28571	3	2	3	2	3	2	2.44949	2.76642
27	Harpiosquilla raphidea	1	1	1	1	1	2	2	1.29	2	2	3	2	3	2	2.28943	2.62785
28	Oratosquillina interrupta	1	1	1	1	1	2	2	1.29	2	2	3	2	3	2	2.28943	2.62785
29	Oratosquilla nepa	1	1	1	1	1	2	2	1.29	2	2	3	3	3	2	2.44949	2.76841
30	Thenus indicus	1	1	1	1	1	2	2	1.28571	3	2	3	3	3	2	2.62074	2.91913
31	Diogenes sp.	1	1	2	1	1	1	2	1.28571	3	2	3	3	3	2	2.62074	2.91913
32	Diogenes sp.	1	1	2	1	1	1	2	1.29	3	2	3	3	3	2	2.62074	2.92102
33	Clibanarius infraspinatus	1	1	2	1	1	1	2	1.29	2	2	3	3	3	2	2.44949	2.76841
34	Dardanus lagopodes	1	1	2	1	1	1	2	1.29	3	2	3	3	3	2	2.62074	2.92102
35	Calappa clypeata	NA	NA	NA	1	NA	NA	2	NA	3	2	3	3	3	2	2.62074	#VALUE!
36	Dorippe quadridens	1	1	1	1	1	1	2	1.14286	3	2	3	3	3	2	2.62074	2.85909
37	Doclea armata	1	1	2	1	1	1	1	1.14286	3	2	3	3	3	2	2.62074	2.85909
38	Doclea canalifera	1	1	2	1	1	1	1	1.14	3	2	3	3	3	2	2.62074	2.85795
39	Doclea sp.	1	1	2	1	1	1	1	1.14	3	2	3	3	3	2	2.62074	2.85795
40	Crab1	1	1	2	1	1	1	2	1.28571	3	2	3	3	3	2	2.62074	2.91913
41	Galene bispinosa	1	1	2	1	1	1	2	1.29	3	2	3	3	3	2	2.62074	2.92102
42	Halimede ochtodes	1	1	2	1	1	1	2	1.29	3	2	3	3	3	2	2.62074	2.92102
43	Seulocia vittata	NA	NA	NA	1	1	1	2	NA	3	2	3	3	3	2	2.62074	#VALUE!
44	Myomenippe hardwickii	1	1	1	1	1	1	2	1.14286	3	2	3	3	3	2	2.62074	2.85909
45	Matuta planipes	1	1	1	1	1	1	3	1.28571	3	2	3	3	3	2	2.62074	2.91913
46	Matuta victor	1	1	1	1	1	1	3	1.29	3	2	3	3	3	2	2.62074	2.92102
47	Macrophthalmus sp.	NA	1	2	1	1	1	3	1.5	3	2	3	3	3	2	2.62074	3.01965
48	Enoplolambrus sp..	NA	NA	NA	NA	NA	1	3	NA	3	2	3	3	3	2	2.62074	#VALUE!
49	Rhinolambrus sp.	NA	NA	NA	NA	NA	1	3	NA	3	2	3	3	3	2	2.62074	#VALUE!
50	Charybdis affinis	1	1	1	1	1	1	2	1.14286	3	2	3	2	3	2	2.44949	2.70298
51	Charybdis anisodon	1	1	1	1	1	1	2	1.14	3	2	3	3	3	2	2.62074	2.85795
52	Charybdis feriata	1	1	1	1	1	1	2	1.14	3	2	3	3	3	2	2.62074	2.85795
53	Charybdis natator	1	1	1	1	1	1	2	1.14	3	2	3	3	3	2	2.62074	2.85795
54	Portunus haanii	1	1	1	1	1	1	2	1.14286	3	2	3	3	3	2	2.62074	2.85909
55	Podophthalmus vigil	1	1	1	1	1	1	2	1.14	3	2	3	3	3	2	2.62074	2.85795
56	Portunus pelagicus	1	1	1	1	1	1	2	1.14	3	2	3	3	3	2	2.62074	2.85795
57	Portunus sanguinolentus	1	1	1	1	1	1	2	1.14	3	2	3	3	3	2	2.62074	2.85795
58	Thalamita spinimana	1	1	1	1	1	1	2	1.14	3	2	3	3	3	2	2.62074	2.85795
59	Xiphonectes hastatoides	1	1	1	1	1	1	2	1.14	3	2	3	3	3	2	2.62074	2.85795
60	Ophiocnemis marmorata	NA	1	NA	1	1	1	2	NA	3	2	3	3	3	3	2.80397	#VALUE!
61	Luidia sp.	NA	1	1	1	1	1	2	NA	2	2	3	3	3	2	2.44949	#VALUE!
62	Sea Star 1	NA	1	1	1	1	1	2	NA	2	2	3	3	3	2	2.44949	#VALUE!
63	Sea star 2	NA	1	1	1	1	1	2	NA	2	2	3	3	3	1	2.18225	#VALUE!
64	Temnopleurus toreumaticus	1	1	1	1	1	1	1	1	3	2	3	3	3	2	2.62074	2.80505
65	Acaudina sp.1	1	1	1	1	1	2	1	1.14286	3	2	3	3	3	2	2.62074	2.85909
66	Acaudina sp.2	1	1	1	1	1	2	1	1.14	3	2	3	3	3	2	2.62074	2.85795
67	Sea cucumber	1	1	1	1	1	2	1	1.14	3	2	3	3	2	2	2.44949	2.70178
68	Phyllophorella kohkutiensis	1	1	1	1	1	2	1	1.14	3	2	3	3	3	2	2.62074	2.85795
69	Sea pen	NA	NA	NA	1	NA	1	1	NA	2	2	2	3	2	2	2.13983	#VALUE!
70	Schizaster lacunosus	NA	NA	NA	1	NA	2	1	NA	3	2	2	3	2	2	2.28943	#VALUE!
71	Himantura imbricata	1	1	3	1	1	3	3	1.85714	2	2	3	3	3	2	2.44949	3.07392
72	Maculabatis gerrardi	1	1	3	2	1	3	3	2	2	2	3	3	3	2	2.44949	3.16228
73	Muraenesox cinereus	1	2	2	2	2	1	3	1.85714	2	2	3	3	3	2	2.44949	3.07392
74	Hexanematichthys sagor	1	2	3	1	1	2	3	1.85714	2	2	3	3	3	2	2.44949	3.07392
75	Hippocampus sp.	1	1	2	1	1	3	3	1.71429	3	2	2	1	1	2	1.69838	2.41315
76	Platycephalus sp.	1	1	1	1	2	1	3	1.42857	3	2	3	2	3	3	2.62074	2.98481
77	Platycephalus indicus	1	1	1	1	2	1	3	1.42857	3	2	3	2	3	3	2.62074	2.98481
78	Ambassis sp.	1	1	1	1	1	1	3	1.28571	3	2	3	1	1	3	1.94416	2.33084
79	Gerres macracanthus	1	1	1	1	1	1	3	1.28571	3	2	3	1	2	3	2.18225	2.53284
80	Sillago sihama	1	1	1	1	1	1	3	1.28571	3	2	3	1	2	3	2.18225	2.53284
81	Alepes djedaba	1	1	1	1	1	2	3	1.42857	3	2	3	1	3	3	2.33482	2.73718
82	Megalaspis cordyla	1	1	1	1	1	1	3	1.28571	3	2	1	1	3	3	1.94416	2.33084
83	Pampus chinensis	1	1	1	1	1	1	3	1.28571	3	2	3	1	3	3	2.33482	2.66541
84	Eubleekeria splendens	1	1	1	1	1	1	2	1.14286	3	2	1	1	1	3	1.61887	1.98163
85	Gazza minuta	1	1	1	1	1	1	2	1.14286	3	2	3	1	1	3	1.94416	2.25519
86	Nuchequula gerreoides	1	1	1	1	1	1	2	1.14286	3	2	3	1	1	3	1.94416	2.25519
87	Secutor hanedai	1	1	2	1	1	1	2	1.28571	3	2	3	1	1	3	1.94416	2.33084
88	Lutjanus russelli	1	1	1	1	1	2	3	1.42857	2	2	3	2	3	3	2.44949	2.83563
89	Priacanthus tayenus	1	1	1	1	1	1	3	1.28571	3	2	1	1	3	3	1.94416	2.33084
90	Eleutheronema tetradactylum	1	2	1	1	1	1	3	1.42857	3	2	3	1	3	3	2.33482	2.73718
91	Johnius amblycephalus	1	1	1	1	1	1	3	1.28571	3	2	3	3	2	3	2.62074	2.91913
92	Pseudosciaena soldado	1	2	1	1	1	1	3	1.42857	3	2	3	1	2	3	2.18225	2.60826
93	Otolithes ruber	1	1	1	1	1	1	3	1.28571	3	2	3	1	2	3	2.18225	2.53284
94	Pennahia anea	1	1	1	1	1	1	3	1.28571	3	2	3	1	2	3	2.18225	2.53284
95	Panna microdon	1	1	1	1	1	1	3	1.28571	3	2	3	3	2	3	2.62074	2.91913
96	Upeneus sulphureus	1	1	1	1	1	1	2	1.14286	3	2	1	2	3	3	2.18225	2.4634
97	Drepane punctata	1	2	1	1	1	1	3	1.42857	3	2	2	3	3	3	2.62074	2.98481
98	Terapon puta	1	1	1	1	1	1	2	1.14286	3	2	2	3	3	3	2.62074	2.85909
99	Ephippus orbis	1	1	1	1	1	1	3	1.28571	2	2	3	2	3	3	2.44949	2.76642
100	Epinephelus sexfasciatus	1	1	1	1	1	2	3	1.42857	2	2	1	1	1	3	1.51309	2.08092
101	Scomberomorus commerson	1	2	1	2	2	1	3	1.71429	2	2	1	2	3	3	2.03965	2.66438
102	Siganus javus	1	1	1	1	1	1	1	1	2	2	3	3	3	3	2.62074	2.80505
103	Brachirus orientalis	1	2	1	1	1	1	3	1.42857	3	2	3	3	3	3	2.80397	3.14691
104	Brachirus harmandi	1	1	1	1	1	1	3	1.28571	3	2	3	3	3	3	2.80397	3.08469
105	Synaptura commersonnii	1	1	1	1	1	2	3	1.42857	3	2	3	3	3	3	2.80397	3.14691
106	Cynoglossus trulla	1	1	1	1	1	2	3	1.42857	3	2	3	3	3	3	2.80397	3.14691
107	Cynoglossus sp. 1	1	1	1	1	1	2	3	1.42857	3	2	3	3	3	3	2.80397	3.14691
108	Cynoglossus sp.2	1	1	1	1	1	2	3	1.42857	3	2	3	3	3	3	2.80397	3.14691
109	Triacanthus nieuhofii	1	1	2	1	1	1	3	1.42857	3	2	1	2	3	3	2.18225	2.60826
110	Lagocephalus lunaris	1	1	2	1	1	2	3	1.57143	3	2	1	1	3	3	1.94416	2.49983
111	Takifugu oblongus	1	1	2	1	1	2	2	1.42857	3	2	1	2	1	3	1.81712	2.31144
