# Supplementary material for: Catch composition and risk assessment of two fishing gears used in small-scale fisheries of Bandon Bay, the Gulf of Thailand
Source: PeerJ. 2022 Aug 16;10:e13878. doi: 10.7717/peerj.13878 (PMC9390328; doi:10.7717/peerj.13878)
Supplement: Supplemental Information 3 — Note: (1) Detail of each attribute is provided in Table 1; (2) P-, S- and V- score are Productivity, Susceptibility and Vulnerability-scores respectively. [file peerj-10-13878-s003.xlsx]

## Sheet: Rank score for trap
Catch composition and risk assessment of two fishing gears used in small scale fisheries of Bandon Bay, the Gulf of Thailand
Supplement data 3: Rank scores for the productivity- and susceptibiltiy attributes for the catches by collapsible crab traps in Bandon Bay, Surratthani, Thailand.
Note: (1) Detail of each attribute is provided in Table 1; (2) P-, S- and V- score are Productivity, Susceptibility and Vulnerabi;ity-scores respectively
No	Species	P1	P2	P3	P4	P5	P6	P7	P-score	S1	S2	S3	S4	S5	S6	S-Score	V -score
1	Sea animone	NA	NA	NA	1	NA	1	1	NA	3	2	3	3	1	2	2.18225	#VALUE!
2	Natica vitellus	1	1	1	1	1	1	2	1.14286	3	2	3	3	1	2	2.18225	2.4634
3	Pleuroploca sp.	NA	NA	NA	1	1	1	2	NA	3	2	3	3	1	2	2.18225	#VALUE!
4	Indothais sp.	1	1	1	1	1	1	2	1.14286	3	2	3	3	1	2	2.18225	2.4634
5	Lataxiena blosvillei	1	1	1	1	1	1	2	1.14	3	2	3	3	1	2	2.18225	2.46207
6	Murex sp.1	1	1	1	1	1	1	2	1.14286	3	2	3	3	1	2	2.18225	2.4634
7	Murex sp.2	1	1	1	1	1	1	2	1.14	3	2	3	3	1	2	2.18225	2.46207
8	Hemifusus sp.	1	1	1	1	1	1	2	1.14286	3	2	3	3	1	2	2.18225	2.4634
9	Pugilina cochilidium	1	1	1	1	1	1	2	1.14	3	2	3	3	1	2	2.18225	2.46207
10	Nassaria pusilla	1	1	1	1	1	1	2	1.14286	3	2	3	3	1	2	2.18225	2.4634
11	Nassarius siquijorensis	1	1	1	1	1	1	2	1.14	3	2	3	3	1	2	2.18225	2.46207
12	Cymbiola nobilis	1	1	1	1	1	1	2	1.14286	3	2	3	3	1	2	2.18225	2.4634
13	Anadara inaequivalvis	1	1	1	1	1	1	1	1	3	2	3	3	1	2	2.18225	2.40046
14	Tegillarca nodifera	1	1	1	1	1	1	1	1	3	2	3	3	1	2	2.18225	2.40046
15	Mimachlamys sp. (Chlamys sp.)	1	1	1	1	1	1	1	1	3	2	3	3	1	2	2.18225	2.40046
16	Paphia undulata	1	1	1	1	1	1	1	1	3	2	3	3	1	2	2.18225	2.40046
17	Sepia sp.1	1	1	2	1	1	2	3	1.57143	2	2	3	2	1	2	1.90637	2.47055
18	Sepia sp.2	1	1	2	1	1	2	3	1.57	2	2	3	2	1	2	1.90637	2.46964
19	Sepiella inermis	1	1	2	1	1	2	3	1.57	3	2	3	2	1	2	2.03965	2.57392
20	Octopus sp.	1	1	2	1	1	2	3	1.57143	3	2	3	3	2	2	2.44949	2.91022
21	Tachypleus gigas	1	2	2	1	1	2	2	1.57143	3	2	3	3	1	2	2.18225	2.68916
22	Harpiosquilla harpax	1	1	1	1	1	2	2	1.28571	2	2	3	3	3	2	2.44949	2.76642
23	Harpiosquilla raphidea	1	1	1	1	1	2	2	1.29	2	2	3	3	3	2	2.44949	2.76841
24	Oratosquillina interrupta	1	1	1	1	1	2	2	1.29	2	2	3	3	3	2	2.44949	2.76841
25	Oratosquilla woodmasoni	1	1	1	1	1	2	2	1.29	2	2	3	3	3	2	2.44949	2.76841
26	Oratosquilla nepa	1	1	1	1	1	2	2	1.29	2	2	3	3	3	2	2.44949	2.76841
27	Macrobrachium rosenbergii	1	1	1	1	1	1	3	1.28571	1	2	1	3	3	2	1.81712	2.22598
28	Metapenaeus sp.	1	1	1	1	1	1	2	1.14286	3	2	3	3	3	2	2.62074	2.85909
29	Penaeus semisulcatus	1	1	1	1	1	1	2	1.14	3	2	3	3	3	2	2.62074	2.85795
30	Penaeus silasi	1	1	1	1	1	1	2	1.14	3	2	3	3	3	2	2.62074	2.85795
31	Diogenes sp.1	1	1	2	1	1	1	2	1.28571	3	2	3	3	3	2	2.62074	2.91913
32	Diogenes sp.2	1	1	2	1	1	1	2	1.29	3	2	3	3	3	2	2.62074	2.92102
33	Clibanarius infraspinatus	1	1	2	1	1	1	2	1.29	3	2	3	3	3	2	2.62074	2.92102
34	Dardanus lagopodes	1	1	2	1	1	1	2	1.29	3	2	3	3	3	2	2.62074	2.92102
35	Dorippe quadridens	1	1	1	1	1	1	2	1.14286	3	2	3	3	3	2	2.62074	2.85909
36	Neodorippe callida	1	1	1	1	1	1	2	1.14	3	2	3	3	3	2	2.62074	2.85795
37	Myomenippe hardwickii	1	1	1	1	1	1	2	1.14	3	2	3	3	3	2	2.62074	2.85795
38	Matuta planipes	1	1	1	1	1	1	3	1.28571	3	2	3	3	3	2	2.62074	2.91913
39	Matuta victor	1	1	1	1	1	1	3	1.29	3	2	3	3	3	2	2.62074	2.92102
40	Doclea armata	1	1	2	1	1	1	1	1.14286	3	2	3	3	3	2	2.62074	2.85909
41	Doclea rissoni	1	1	2	1	1	1	1	1.14	3	2	3	3	3	2	2.62074	2.85795
42	Doclea sp.	1	1	2	1	1	1	1	1.14	3	2	3	3	3	2	2.62074	2.85795
43	Doclea canalifera	1	1	2	1	1	1	1	1.14	3	2	3	3	3	2	2.62074	2.85795
44	Charybdis affinis	1	1	1	1	1	1	2	1.14286	3	2	3	3	3	2	2.62074	2.85909
45	Charybdis anisodon	1	1	1	1	1	1	2	1.14	3	2	3	3	3	2	2.62074	2.85795
46	Charybdis feriata	1	1	1	1	1	1	2	1.14	3	2	3	3	3	2	2.62074	2.85795
47	Charybdis truncata	1	1	1	1	1	1	2	1.14	3	2	3	3	3	2	2.62074	2.85795
48	Lupocycloporus gracilimanus	1	1	1	1	1	1	2	1.14286	3	2	3	3	3	2	2.62074	2.85909
49	Portunus haanii	1	1	1	1	1	1	2	1.14	3	2	3	3	3	2	2.62074	2.85795
50	Portunus pelagicus	1	1	1	1	1	1	2	1.14	3	2	3	3	3	2	2.62074	2.85795
51	Portunus sanguinolentus	1	1	1	1	1	1	2	1.14	3	2	3	3	3	2	2.62074	2.85795
52	Scylla olivacea	1	1	1	1	1	1	2	1.14286	3	2	3	3	3	2	2.62074	2.85909
53	Thalamita crenata	1	1	1	1	1	1	2	1.14286	3	2	3	3	3	2	2.62074	2.85909
54	Thalamita spinimana	1	1	1	1	1	1	2	1.14	3	2	3	3	3	2	2.62074	2.85795
55	Thalamita sima	1	1	1	1	1	1	2	1.14	3	2	3	3	3	2	2.62074	2.85795
56	Xiphonectes hastatoides	1	1	1	1	1	1	2	1.14	3	2	3	3	3	2	2.62074	2.85795
57	Galene bispinosa	1	1	2	1	1	1	2	1.28571	3	2	3	3	3	2	2.62074	2.91913
58	Unidentified	1	1	2	1	1	1	2	1.29	3	2	3	3	3	2	2.62074	2.92102
59	Halimede ochtodes	1	1	2	1	1	1	2	1.29	3	2	3	3	3	2	2.62074	2.92102
60	Seulocia vittata	NA	NA	NA	1	1	1	2	NA	3	2	3	3	3	2	2.62074	#VALUE!
61	Varuna yui	NA	1	NA	1	1	1	2	NA	3	2	3	3	3	2	2.62074	#VALUE!
62	Ophiocnemis sp.	NA	1	NA	1	1	1	2	NA	3	2	3	3	3	2	2.62074	#VALUE!
63	Luidia sp.	NA	1	NA	1	NA	1	2	NA	3	2	3	3	1	2	2.18225	#VALUE!
64	Sea Star 1	NA	1	1	1	1	1	2	NA	3	2	3	3	1	2	2.18225	#VALUE!
65	Sea star 2	NA	1	1	1	1	1	2	NA	3	2	3	3	1	2	2.18225	#VALUE!
66	Temnopleurus toreumaticus	1	1	1	1	1	1	1	1	3	2	3	3	3	2	2.62074	2.80505
67	Arachnoides placenta	1	1	1	1	1	1	1	1	3	2	3	3	1	2	2.18225	2.40046
68	Acaudina sp.1	1	1	1	1	1	2	1	1.14286	3	2	3	3	1	2	2.18225	2.4634
69	Acaudina sp.2	1	1	1	1	1	2	1	1.14	3	2	3	3	1	2	2.18225	2.46207
70	Sea cucumber	1	1	1	1	1	2	1	1.14	3	2	3	3	1	2	2.18225	2.46207
71	Phyllophorella kohkutiensis	1	1	1	1	1	2	1	1.14	3	2	3	3	1	2	2.18225	2.46207
72	Sea pen	NA	NA	NA	1	NA	1	1	NA	3	2	3	3	1	2	2.18225	#VALUE!
73	Muraenesox cinereus	1	2	2	2	2	1	3	1.85714	1	2	1	2	2	2	1.5874	2.44312
74	Sardinella gibbosa	1	1	1	1	1	1	2	1.14286	3	2	3	1	1	2	1.81712	2.14664
75	Thryssa kammalensis	1	1	1	1	1	1	3	1.28571	3	2	3	1	1	2	1.81712	2.22598
76	Hexanematichthys sagor	1	2	3	1	1	2	3	1.85714	3	2	3	3	2	2	2.44949	3.07392
77	Batrachomoeus trispinosus	1	2	2	1	1	2	3	1.71429	3	2	3	3	2	2	2.44949	2.98978
78	Platycephalus indicus	1	1	1	1	2	1	3	1.42857	3	2	3	3	2	2	2.44949	2.83563
79	Vespicula trachinoides	1	1	2	1	1	2	2	1.42857	3	2	3	2	2	2	2.28943	2.69857
80	Ambassis vachellii	1	1	1	1	1	1	3	1.28571	3	2	3	2	1	2	2.03965	2.41106
81	Ostorhinchus fasciatus	1	1	2	1	1	3	3	1.71429	2	2	3	2	2	2	2.13983	2.74183
82	Petroscirtes sp.	1	1	1	1	1	2	2	1.28571	3	2	3	2	1	2	2.03965	2.41106
83	Acentrogobius caninus	1	1	1	1	1	2	3	1.42857	3	2	3	2	2	2	2.28943	2.69857
84	Alepes djedaba	1	1	1	1	1	2	3	1.42857	3	2	3	2	1	2	2.03965	2.49018
85	Carangoides praeustus	1	1	1	1	1	2	3	1.42857	3	2	3	2	1	2	2.03965	2.49018
86	Carangoides sp.	1	2	1	1	1	2	3	1.57143	1	2	1	2	1	2	1.41421	2.11409
87	Gazza minuta	1	1	1	1	1	1	2	1.14286	3	2	3	2	1	2	2.03965	2.33801
88	Nuchequula gerreoides	1	1	1	1	1	1	2	1.14286	3	2	3	2	1	2	2.03965	2.33801
89	Secutor hanedai	1	1	1	1	1	1	2	1.14286	3	2	3	2	1	2	2.03965	2.33801
90	Lutjanus russelli	1	1	1	1	1	2	3	1.42857	2	2	3	2	2	2	2.13983	2.57287
91	Pomadasys maculatus	1	2	1	1	1	2	3	1.57143	3	2	3	2	2	2	2.28943	2.77685
92	Pomadasys kaakan	1	2	1	1	1	2	3	1.57143	3	2	3	2	2	2	2.28943	2.77685
93	Johnius amblycephalus	1	1	1	1	1	1	3	1.28571	3	2	3	2	2	2	2.28943	2.62575
94	Pseudosciaena soldado	1	2	1	1	1	1	3	1.42857	3	2	3	2	2	2	2.28943	2.69857
95	Otolithes ruber	1	1	1	1	1	1	3	1.28571	3	2	3	2	2	2	2.28943	2.62575
96	Pennahia anea	1	1	1	1	1	1	3	1.28571	3	2	3	2	2	2	2.28943	2.62575
97	Upeneus sulphureus	1	1	1	1	1	1	2	1.14286	3	2	3	2	2	2	2.28943	2.55883
98	Upeneus sundaicus	1	1	2	1	1	1	3	1.42857	3	2	3	2	2	2	2.28943	2.69857
99	Terapon jarbua	1	2	1	1	1	1	3	1.42857	3	2	3	2	2	2	2.28943	2.69857
100	Terapon puta	1	1	1	1	1	1	2	1.14286	3	2	3	2	2	2	2.28943	2.55883
101	Terapon theraps	1	1	1	1	1	1	3	1.28571	3	2	3	2	2	2	2.28943	2.62575
102	Sphyraena jello	2	3	1	2	2	1	3	2	1	2	1	1	1	2	1.25992	2.36377
103	Scatophagus argus	1	1	1	1	1	1	2	1.14286	3	2	3	2	2	2	2.28943	2.55883
104	Epinephelus coioides	1	2	1	2	2	2	3	1.85714	3	2	3	2	1	2	2.03965	2.75847
105	Epinephelus sexfasciatus	1	1	2	1	1	2	3	1.57143	2	2	3	2	2	2	2.13983	2.65485
106	Siganus canaliculatus	1	1	1	1	1	1	2	1.14286	3	2	3	2	2	2	2.28943	2.55883
107	Siganus javus	1	1	1	1	1	1	1	1	2	2	2	2	2	2	2	2.23607
108	Brachirus orientalis	1	1	1	1	1	1	3	1.28571	3	2	3	2	2	2	2.28943	2.62575
109	Brachirus harmandi	1	1	1	1	1	1	3	1.28571	3	2	3	2	2	2	2.28943	2.62575
110	Cynoglossus arel	1	1	1	1	1	2	3	1.42857	2	2	2	2	2	2	2	2.45781
111	Cynoglossus trulla	1	1	1	1	1	2	3	1.42857	2	2	2	2	2	2	2	2.45781
112	Cynoglossus sp. 1	1	1	1	1	1	2	3	1.42857	2	2	2	2	2	2	2	2.45781
113	Cynoglossus sp.2	1	1	1	1	1	2	3	1.42857	2	2	2	2	2	2	2	2.45781
114	Triacanthus nieuhofii	1	1	2	1	1	1	3	1.42857	2	2	3	2	2	2	2.13983	2.57287
115	Paramonacanthus choirocephalus	1	1	2	1	1	1	2	1.28571	2	2	3	2	2	2	2.13983	2.49638
116	Chelonodon sp.	1	1	2	1	1	2	3	1.57143	2	2	2	2	2	2	2	2.5435
117	Lagocephalus lunaris	1	1	2	1	1	2	3	1.57143	2	2	3	2	2	2	2.13983	2.65485
118	Takifugu oblongus	1	1	2	1	1	2	2	1.42857	2	2	3	2	2	2	2.13983	2.57287
